# Supplementary material for: A turn-on fluorescent probe based on indolizine for the detection of sulfite
Source: Royal Society of Chemistry journal article supplement (doi:10.1039/d2nj00238h), 2022-01-01
Supplement: d2nj00238h1.pdf [file d2nj00238h1.pdf]

## **A turn-on fluorescent probe based on indolizine for detection of sulfite**

Renle Cui,<sup>1</sup> Yunlong Gao,<sup>2</sup> Haiyan Ge,<sup>1</sup> Guowei Shi,<sup>1</sup> Yongchao Li,<sup>1</sup> Hao Liu,<sup>1</sup> Chuanjun Ma,<sup>1</sup> Yanqing Ge,<sup>1\*</sup> Caihong Liu<sup>1\*</sup>

*<sup>1</sup>Department of Chemistry and Pharmaceutical Engineering, Shandong First Medical University, Shandong Academy of Medical Sciences, Taian, Shandong 271016, P. R. China.*

*<sup>2</sup>Center for disease control and prevention, Weifang binhai economic and technological development zone, Weifang, Shandong, P. R. China.*

geyanqing2016@126.com (Y. Ge); liuch7688@163.com (C. Liu)

## **Table of Contents:**

**Fig. S1** L Fluorescence intensity changes (  $I_{458}$ ) of **CRL-1** (10  $\mu$ M) upon gradual addition of  $\text{SO}_3^{2-}$  .

**Fig. S2** Fluorescence spectra of **CRL-1** with other ions.

**Fig. S3** UV absorption spectra of **CRL-1** in different solvents.

**Fig. S4** Fluorescence emission spectra of **CRL-1** in different solvents.

**Fig. S5**  $^1\text{H}$  NMR spectrum of compound **1**.

**Fig. S6**  $^1\text{H}$  NMR spectrum of probe **CRL-1**.

**Fig. S7**  $^{13}\text{C}$  NMR spectrum of probe **CRL-1**.

**Fig. S8** Comparison of the  $^1\text{H}$  NMR spectrum of the probe and the probe with  $\text{SO}_3^{2-}$ .

**Fig. S9** HRMS spectra of **CRL-1**.

**Fig. S10** HRMS spectra of **CRL-1** in the presence of  $\text{SO}_3^{2-}$ .

**Table 1.** Comparison of fluorescent probes for aldehyde group detection of  $\text{SO}_3^{2-}$ .

**Table 2.** Hygroscopic test of **CRL-1**.

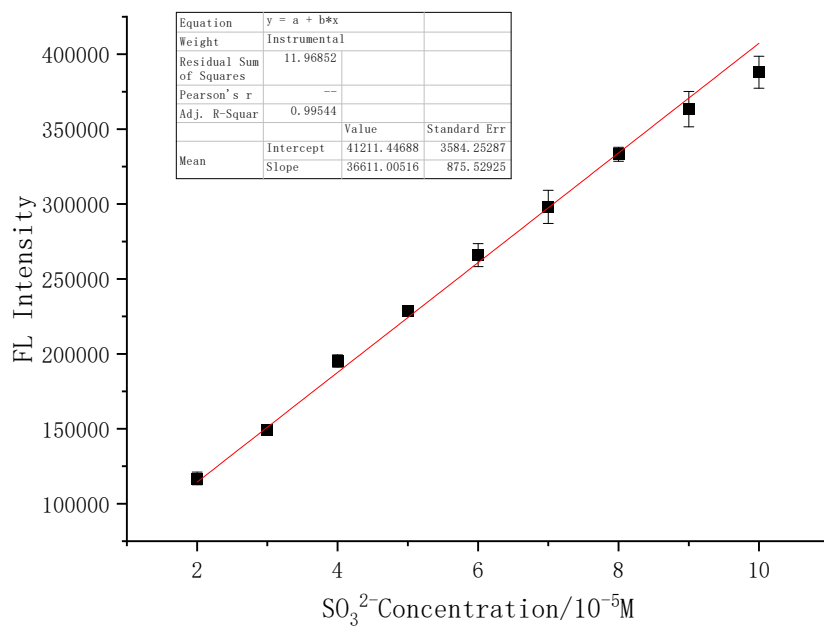

**Fig. S1** L Fluorescence intensity changes ( $I_{458}$ ) of **CRL-1** (10  $\mu$ M) upon gradual addition of  $\text{SO}_3^{2-}$ .

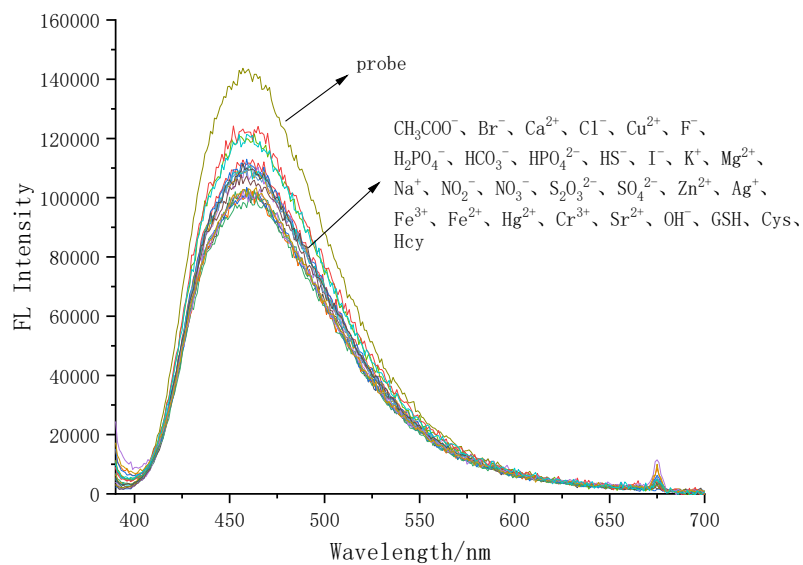

**Fig. S2** Fluorescence spectra of **CRL-1** with other ions in DMSO/PBS=3/7 (pH = 7.4,  $\lambda_{ex}$  = 380 nm, slit:

2 nm/2 nm)

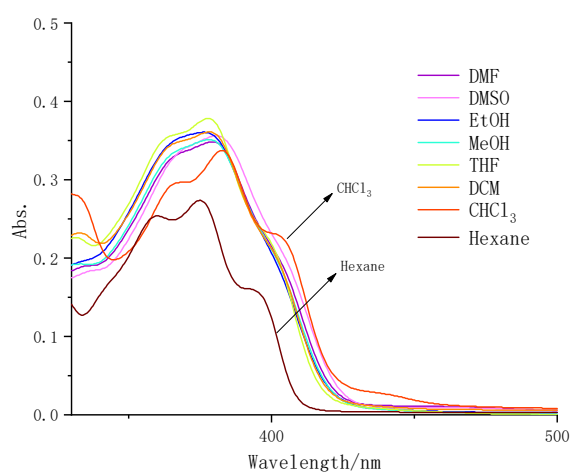

**Fig. S3** UV absorption spectra of **CRL-1** in different solvents.

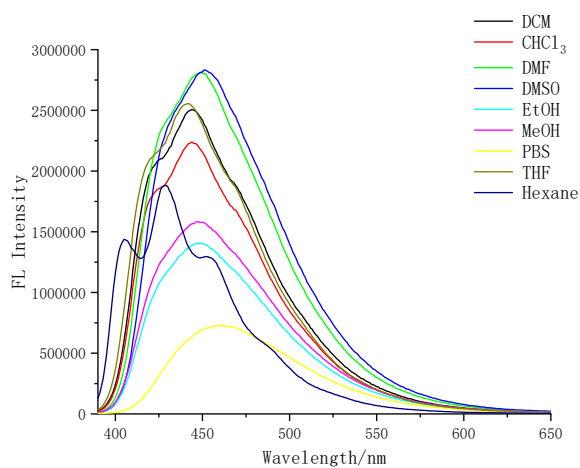

**Fig. S4** Fluorescence emission spectra of **CRL-1** in different solvents.

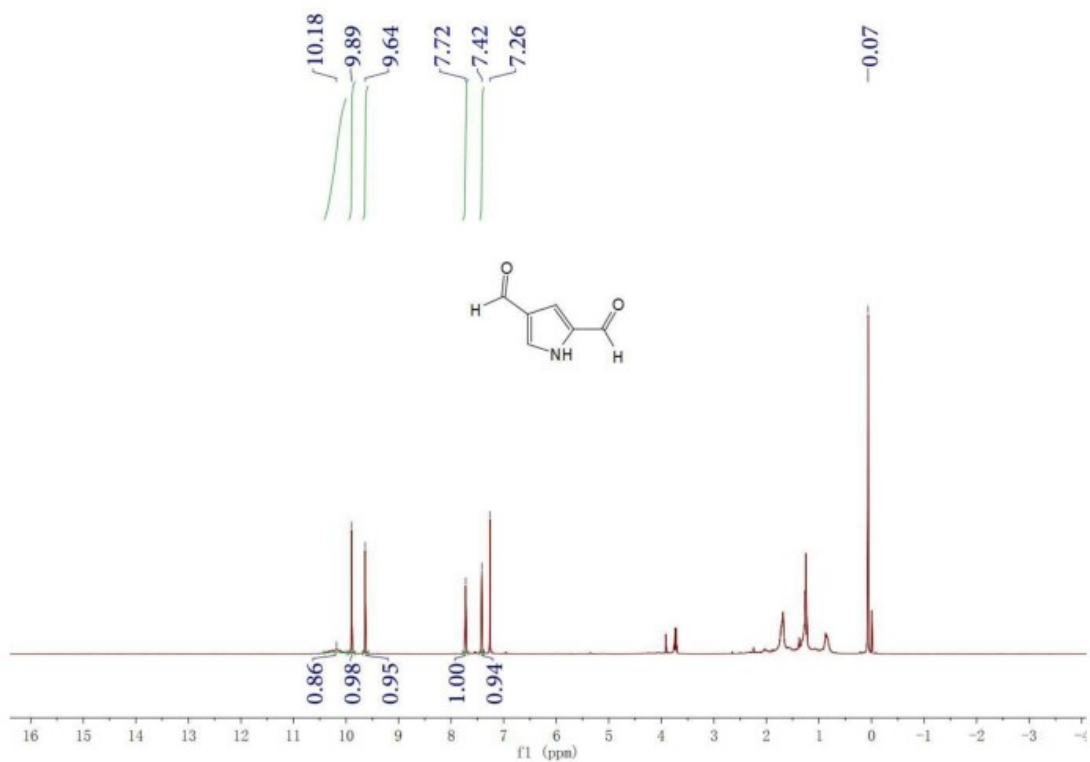

Fig. S5 <sup>1</sup>H NMR spectrum of **compound 1**.

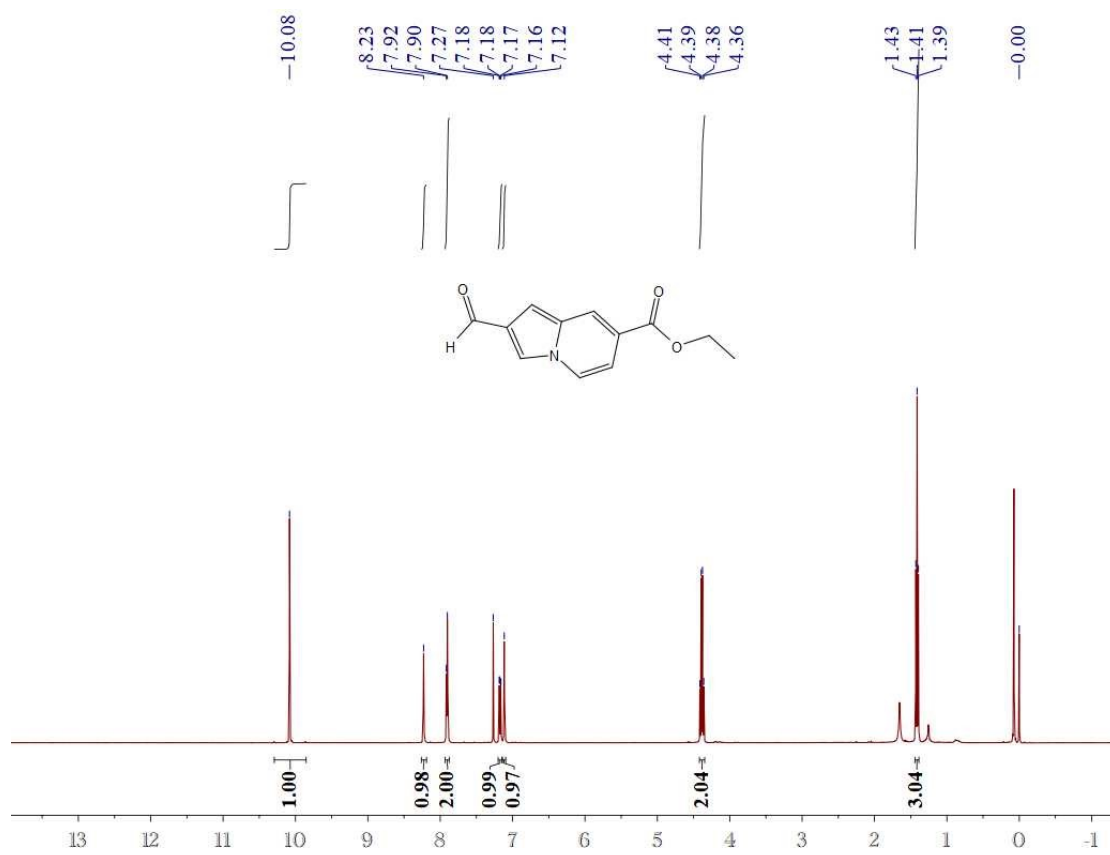

Fig. S6 <sup>1</sup>H NMR spectrum of probe **CRL-1**.

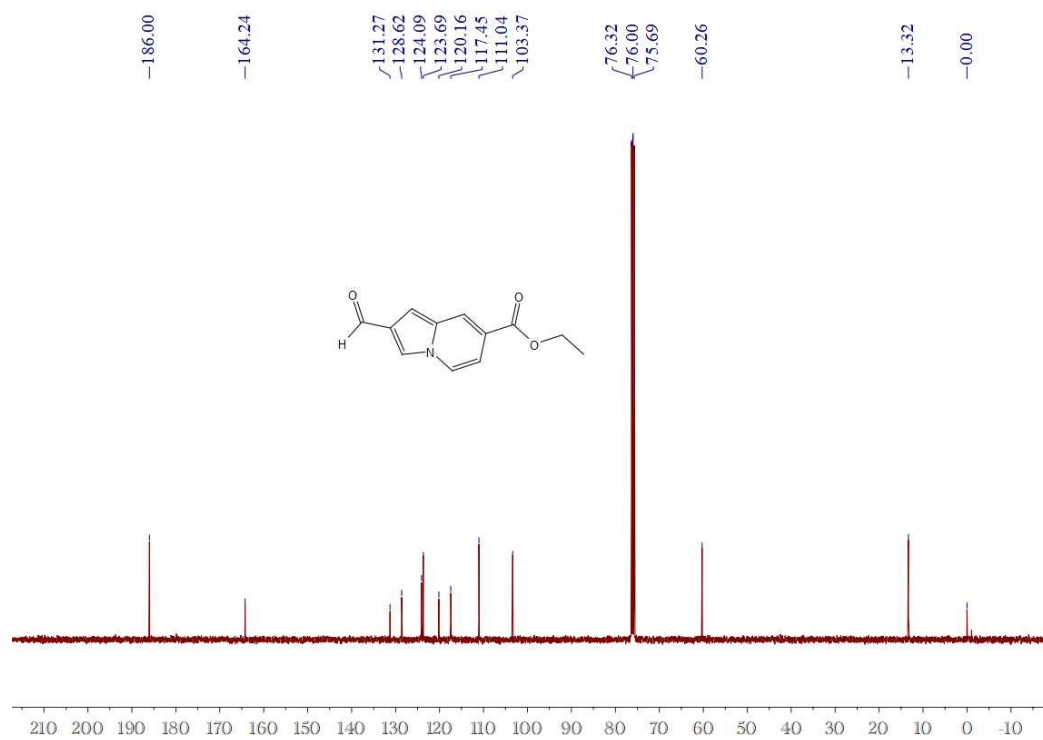

Fig. S7 <sup>13</sup>C NMR spectrum of probe CRL-1.

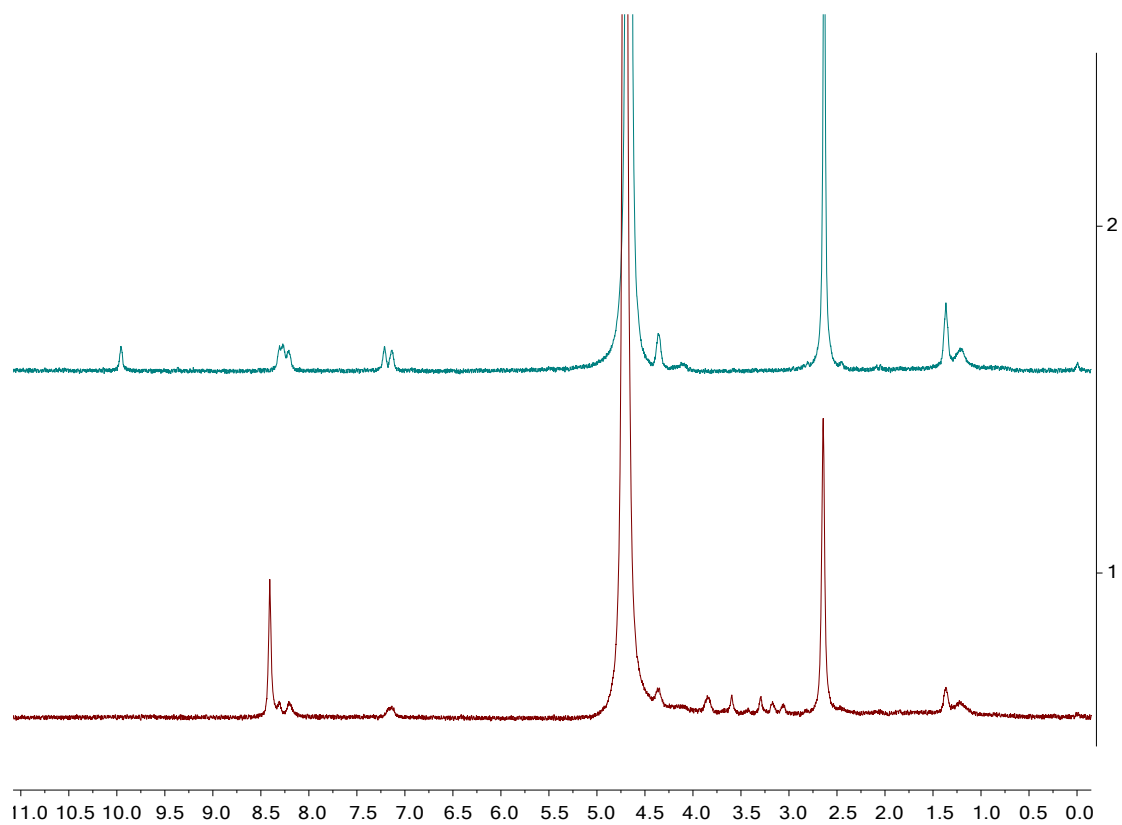

Fig. S8 Comparison of the <sup>1</sup>H NMR spectrum of the probe and the probe with  $\text{SO}_3^{2-}$ .

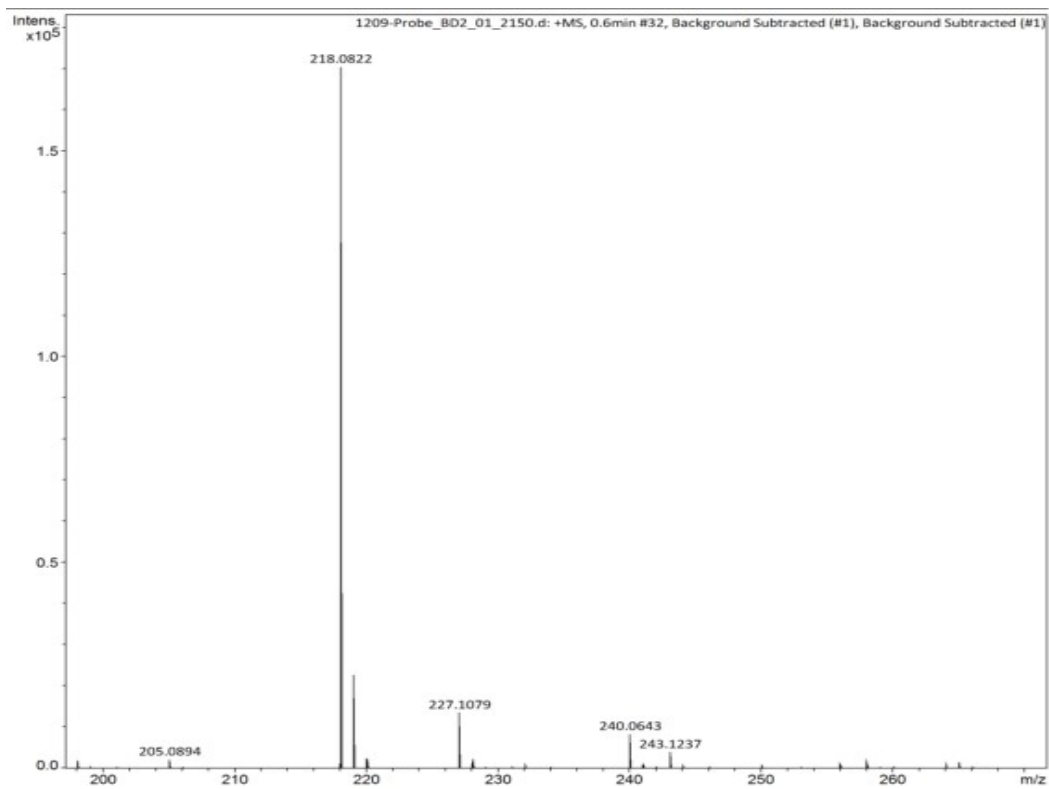

Fig. S9 HRMS spectra of CRL-1( [M+H]<sup>+</sup> :218.0817)

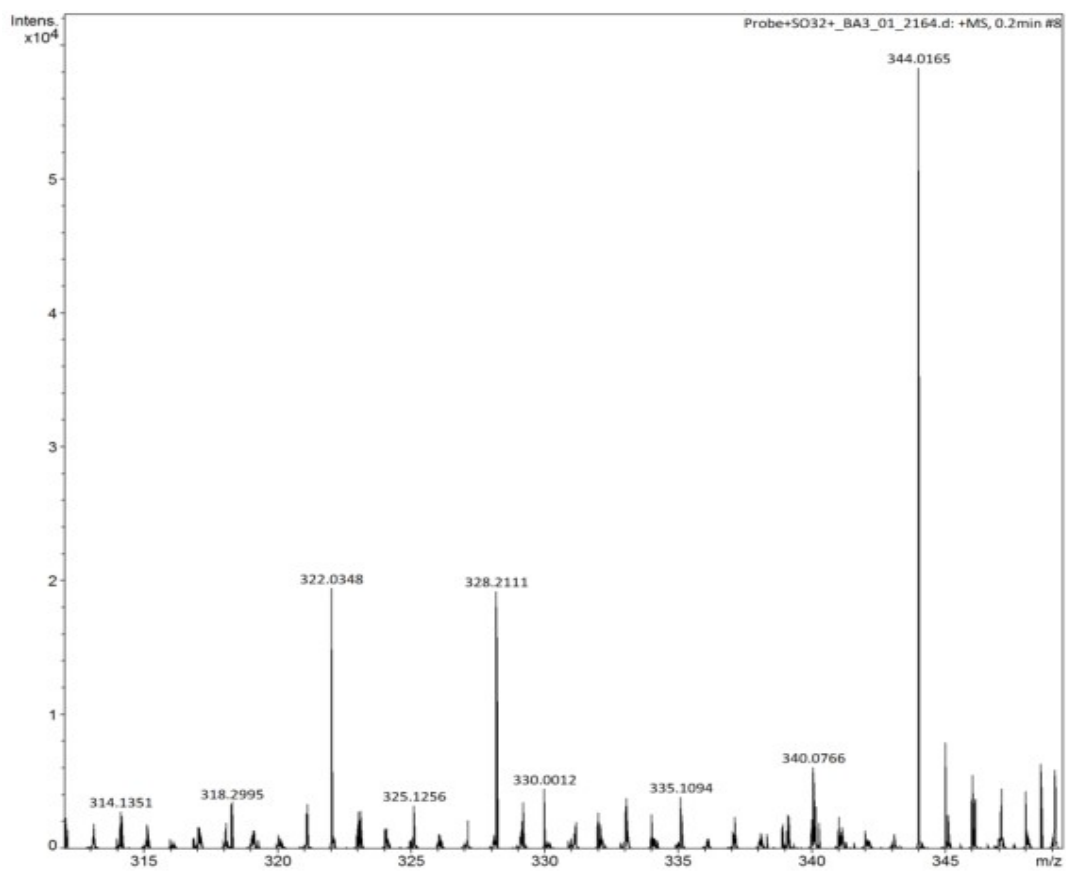

Fig. S10 HRMS spectra of CRL-1 in the presence of Na<sub>2</sub>SO<sub>3</sub>( [M+Na]<sup>+</sup> :344.0181)

**Table 1.** Comparison of fluorescent probes for aldehyde group detection of  $\text{SO}_3^{2-}$ 

| Probe                                                                               | Solvent                      | Detection limit     | Response time | Ref. |
|-------------------------------------------------------------------------------------|------------------------------|---------------------|---------------|------|
| 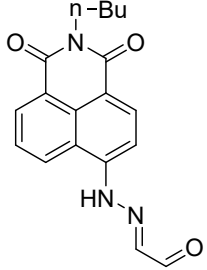   | DMSO/acetate=1/1             | 100 $\mu\text{M}$   | 5min          | 1    |
|    | THF/H <sub>2</sub> O = 8/2   | 0.9 $\mu\text{M}$   | 10min         | 2    |
|   | EtOH H <sub>2</sub> O = 1/99 | 2.73 $\mu\text{M}$  | 4h            | 3    |
|  | aqueous/DMSO=99/1            | 13.8 $\mu\text{M}$  | 2min          | 4    |
|  | THF/H <sub>2</sub> O=1/99    | 3.0 $\mu\text{M}$   | 2min          | 5    |
|  | DMSO/H <sub>2</sub> O = 2/8  | 0.016 $\mu\text{M}$ | 5s            | 6    |



|                                                                                     |                                |         |       |    |
|-------------------------------------------------------------------------------------|--------------------------------|---------|-------|----|
| 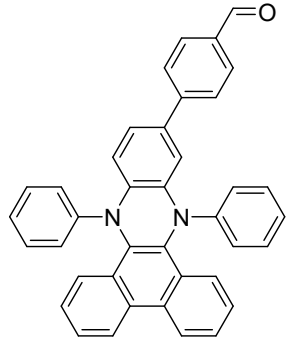   | DMSO/H <sub>2</sub> O =7/3     | 0.071μM | 6min  | 7  |
|    | DMSO/H <sub>2</sub> O =99/1    | 0.08μM  | 30s   | 8  |
|    | DMSO/H <sub>2</sub> O = 1/1    | 43.0μM  | 200s  | 9  |
|    | DMSO/H <sub>2</sub> O=0.5:99.5 | 0.2μM   | 80min | 10 |
|   | H <sub>2</sub> O               | 3.6μM   | 1min  | 11 |
|  | DMSO/H <sub>2</sub> O=1:99     | 3.19μM  | 3min  | 12 |
|  | EtOH H <sub>2</sub> O =2/8     | 0.4μM   | 5min  | 13 |
|  | Tris-HCl                       | 0.07μM  | 2min  | 14 |

|                                                                                     |                           |         |     |           |
|-------------------------------------------------------------------------------------|---------------------------|---------|-----|-----------|
| 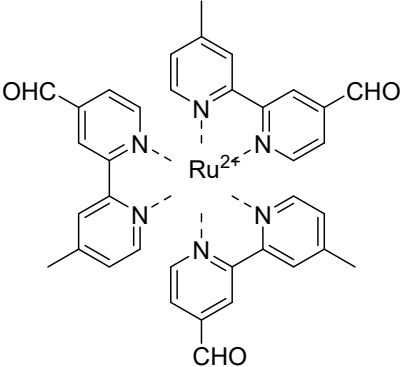   | H <sub>2</sub> O          | 0.52 μM | 60s | 15        |
|    | H <sub>2</sub> O          | 330μM   | 30s | 16        |
|   | DMSO/H <sub>2</sub> O=1:1 | 0.076μM | 30s | 17        |
|  | DMSO/H <sub>2</sub> O=3:7 | 0.81μM  | 20s | This work |

**Table 2.** hygroscopic test of CRL-1.

| Project                  | The first time |       |       | The second time (two weeks later) |       |       |
|--------------------------|----------------|-------|-------|-----------------------------------|-------|-------|
|                          | 1              | 2     | 3     | 1                                 | 2     | 3     |
| Pre-test weight          | 0.510          | 0.520 | 0.525 | 0.510                             | 0.520 | 0.525 |
| After testing weight     | 0.505          | 0.515 | 0.520 | 0.500                             | 0.510 | 0.520 |
| Moisture content         | 0.98%          | 0.96% | 0.95% | 0.99%                             | 0.96% | 0.95% |
| Average moisture content | 0.963%         |       |       | 0.966%                            |       |       |

## References

1. Y. Q. Sun, P. Wang, J. Liu, J. Y. Zhang and W. Guo, *Analyst.*, 2012, **137**, 3430-3433.
2. X. H. Cheng, P. He, Z. C. Zhong and G. J. Liang, *Luminescence.*, 2016, **31**, 1372-1378.
3. X. L. Su, X. H. Li, T. T. Ding, G. L. Zheng and Z. Q. Liu, *J. Organomet. Chem.*, 2015, **781**, 59-64.
4. S. L. Yu, X. L. Yang, Z. L. Shao, Y. Feng, X. G. Xi, R. Shao, Q. X. Guo and X. M. Meng, *Sens. Actuators, B*, 2016, **235**, 362-369.
5. X. H. Cheng, H. Z. Ji, J. Feng, J. G. Qin and Z. Li, *J. Mater. Chem. B*, 2013, **1**, 4110-

- 4114.
6. F. Y. Cai, B. Hou, S. P. Zhang, H. Chen, S. C. Ji, X. C. Shen and H. Liang, *J. Mater. Chem. B*, 2019, **7**, 2493-2498.
  7. Y. R. Li, L. J. Shi, Y. Y. Zhang, G. C. Sun, L. Sun and J. H. Su, *Dyes Pigm.*, 2019, **160**, 794-798.
  8. U. Tamima, S. Singha, H. R. Kim, Y. J. Reo, Y. W. Jun, A. Das and K. H. Ahn, *Sens. Actuators, B*, 2018, **277**, 576-583.
  9. X. Guo, L. L. Xia, J. X. Huang, Y. M. Wang, Y. Q. Gu and P. Wang, *RSC Adv.*, 2018, **8**, 21047-21053.
  10. B. B. Wang, M. X. Lv, W. N. Wu, Z. H. Xu, Y. C. Fan, L. Y. Bian and Y. Wang, *J. Photoch. Photobio. A*, 2021, **411**, 113193.
  11. H. F. Xie, F. Zeng, C. M. Yu and S. Z. Wu, *Polym. Chem.*, 2013, **4**, 5416.
  12. H. F. Xie, X. H. Jiang, F. Zeng, C. M. Yu and S. Z. Wu, *Sens. Actuators, B*, 2014, **203**, 504-510.
  13. G. Wang, H. P. Qi and X. F. Yang, *Luminescence.*, 2013, **28**, 97-101.
  14. D. Zhang, W. Y. Liu, K. K. Chen, J. Y. Cheng, Y. F. Zhao and Y. Ye, *RSC Adv.*, 2016, **6**, 103905-103909.
  15. W. Z. Zhang, H. Liu, F. Y. Zhang, Y. L. Wang, B. Song, R. Zhang and J. L. Yuan, *Microchem. J.*, 2018, **141**, 181-187.
  16. F. J. Huo, Q. Wu, C. X. Yin, W. J. Zhang and Y. B. Zhang, *Spectrochim. Acta. A*, 2019, **214**, 429-435.
  17. L. J. Zhang, Z. Y. Wang, X. J. Cao, J. T. Liu and B. X. Zhao, *Sens. Actuators, B*, 2016, **236**, 741-748.
